# Supplementary material for: Development of Q-LAAD, an allonamer-based antigen test for the rapid detection of SARS-CoV-2
Source: bioRxiv or medRxiv preprint supplement (doi:10.1101/2022.09.23.22280297), 2022-09-25
Supplement: Supplementary file [file media-1.pdf]

## Supplementary Material Captions

### **Table S1: SARS-CoV-2 Antigen Diagnostic Tests with Emergency Use Authorization.**

List of diagnostic tests for the detection of SARS-CoV-2 with FDA Emergency Use Authorizations as of 31May22. Organized first by target antigen, then by company name in alphabetical order. A majority of the tests target the N-protein and are designed as lateral flow assays.

### **Table S2: SARS-CoV-2 Variants and Current SARS-CoV-2 Interagency Group (SIG) Classification.**

List of SARS-CoV-2 Variants of Concern/Variants Being Monitored (both WHO label and PANGO lineage) with SIG classification as of 31May22. Includes location and time each variant was first detected.

### **Table S3: Cross-Reactivity of High-Priority Pathogens Commonly Found in the Respiratory Tract Flora.**

High-priority pathogens that are commonly found in the respiratory tract flora were tested for cross-reactivity with the Q-LAAD assay for detection of SARS-CoV-2.

### **Table S4: Interference of High-Priority Pathogens Commonly Found in the Respiratory Tract Flora.**

High-priority pathogens that are commonly found in the respiratory tract flora were tested for interference with the Q-LAAD assay for detection of SARS-CoV-2.

### **Table S5: Interference of Endogenous Substances.**

Endogenous substances commonly present in clinical samples from the respiratory tract were tested for interference with the Q-LAAD assay for detection of SARS-CoV-2.

**Table S1: SARS-CoV-2 Antigen Diagnostic Tests with Emergency Use Authorization as of 22Sep2022<sup>1</sup>**

| Company                              | Name of Diagnostic Test                                          | Attributes <sup>2</sup>                                         | Date EUA Issued | Antigen Targeted                        | Authorized Settings <sup>3</sup> |
|--------------------------------------|------------------------------------------------------------------|-----------------------------------------------------------------|-----------------|-----------------------------------------|----------------------------------|
| Celltrion USA, Inc.                  | Sampinute COVID-19 Antigen MIA                                   | Magnetic Force-assisted Electrochemical Sandwich IA (MESIA), ST | 10/23/2020      | S-protein RBD                           | H, M                             |
|                                      | Celltrion DiaTrust COVID-19 Ag Home Test                         | LF, VR, OTC, SS, MT                                             | 10/21/2021      | N-protein                               | Home, H, M, W                    |
|                                      | Celltrion DiaTrust COVID-19 Ag Rapid Test                        | LF, VR, SS, MT                                                  | 04/16/2021      | S-protein RBD                           | H, M, W                          |
| Abbott Diagnostics Scarborough, Inc. | BinaxNOW COVID-19 Ag Card                                        | LF, VR, ST                                                      | 08/26/2020      | N-protein                               | H, M, W                          |
|                                      | BinaxNOW COVID-19 Ag Card Home Test                              | LF, VR, OTC, TPS, SS, ST                                        | 12/16/2020      |                                         | Home, H, M, W                    |
|                                      | BinaxNOW COVID-19 Ag 2 Card                                      | LF, VR, Non-prescription Testing, SS, ST                        | 03/31/2021      |                                         | H, M, W                          |
|                                      | BinaxNOW COVID-19 Antigen Self Test                              | LF, VR, OTC, SS, ST                                             | 03/31/2021      |                                         | Home, H, M, W                    |
| Access Bio, Inc.                     | CareStart COVID-19 Antigen Home Test                             | LF, VR, OTC, SS, ST                                             | 08/02/2021      |                                         | Home, H, M, W                    |
|                                      | CareStart COVID-19 Antigen test                                  | LF, VR, SS, ST                                                  | 10/08/2020      |                                         | H, M, W                          |
| ACON Laboratories, Inc               | Flowflex COVID-19 Antigen Home Test                              | LF, VR, OTC, Screening, ST                                      | 10/04/2021      |                                         | Home, H, M, W                    |
| ANP Technologies, Inc                | NIDS COVID-19 Antigen Rapid Test Kit                             | LF, VR, SS, ST                                                  | 09/24/2021      |                                         | H, M, W                          |
| Becton, Dickinson and Company (BD)   | BD Veritor System for Rapid Detection of SARS-CoV-2              | Chromatographic Digital IA, IR, SS, ST                          | 07/02/2020      |                                         | H, M, W                          |
|                                      | BD Veritor At-Home COVID-19 Test                                 | LF, Digital Read, OTC, SS, ST                                   | 8/24/2021       |                                         | Home, H, M, W                    |
| DiaSorin, Inc.                       | LIAISON SARS-CoV-2 Ag                                            | CLIA, ST                                                        | 03/26/2021      |                                         | H, M                             |
| Ellume Limited                       | ellume.lab COVID Antigen Test                                    | LF, Fluorescence, IR, ST                                        | 07/08/2021      |                                         | H, M, W                          |
| Ellume Limited                       | Ellume COVID-19 Home Test                                        | LF, Fluorescence, IR, OTC, SS, ST                               | 12/15/2020      |                                         | Home, H, M, W                    |
| Qorvo Biotechnologies, LLC.          | Omnia SARS-CoV-2 Antigen Test                                    | Bulk Acoustic Wave Biosensor, IR, ST                            | 04/13/2021      |                                         | H, M                             |
| Genabio Diagnostics, Inc.            | Genabio COVID-19 Rapid Self-Test Kit                             | LF, VR, OTC, SS, ST                                             | 07/08/2022      |                                         | Home, H, M, W                    |
| GenBody Inc.                         | GenBody COVID-19 Ag                                              | LF, VR, SS, ST                                                  | 07/13/2021      |                                         | H, M, W                          |
| iHealth Labs, Inc.                   | iHealth COVID-19 Antigen Rapid Test Pro                          | LF, VR, SS, ST                                                  | 01/14/2022      |                                         | H, M, W                          |
|                                      | iHealth COVID-19 Antigen Rapid Test                              | LF, VR, OTC, SS, ST                                             | 11/05/2021      |                                         | Home, H, M, W                    |
| InBios International Inc.            | SCoV-2 Ag Detect Rapid Self-Test                                 | LF, VR, OTC, SS, ST                                             | 11/22/2021      |                                         | Home, H, M, W                    |
|                                      | SCoV-2 Ag Detect Rapid Test                                      | LF, VR, SS, ST                                                  | 05/06/2021      |                                         | H, M, W                          |
| Luminostics, Inc.                    | Clip COVID Rapid Antigen Test                                    | LF immunoluminescent assay, IR, ST                              | 12/07/2020      |                                         | H, M, W                          |
| LumiraDx UK Ltd.                     | LumiraDx SARS-CoV-2 Ag Test                                      | Microfluidic Immunofluorescence Assay, IR, Screening, ST        | 08/18/2020      |                                         | H, M, W                          |
| Maxim Biomedical, Inc.               | MaximBio ClearDetect COVID-19 Antigen Home Test                  | LF, VR, OTC, SS, ST                                             | 01/19/2022      |                                         | Home, H, M, W                    |
| Nano-Ditech Corp.                    | Nano-Check COVID-19 Antigen Test                                 | LF, VR, SS, ST                                                  | 12/06/2021      |                                         | H, M, W                          |
| Oceanit Foundry LLC                  | ASSURE-100 Rapid COVID-19 Test                                   | LF, VR, ST                                                      | 2/28/2022       |                                         | H, M, W                          |
| OraSure Technologies, Inc.           | InteliSwab COVID-19 Rapid Test Rx                                | LF, VR, PHT, ST                                                 | 06/04/2021      |                                         | Home, H, M, W                    |
|                                      | InteliSwab COVID-19 Rapid Test                                   | LF, VR, OTC, SS, ST                                             | 06/04/2021      |                                         | Home, H, M, W                    |
|                                      | InteliSwab COVID-19 Rapid Test Pro                               | LF, VR, SS, ST                                                  | 06/04/2021      |                                         | H, M, W                          |
| Ortho Clinical Diagnostics, Inc.     | VITROS Immunodiagnostic Products SARS-CoV-2 Antigen Reagent Pack | Chemiluminescence IA, IR, ST                                    | 01/11/2021      |                                         | H, M                             |
| OSANG LLC                            | OHC COVID-19 Antigen Self Test                                   | LF, VR, OTC, Serial Testing, ST                                 | 04/06/2022      |                                         | Home, H, M, W                    |
| PHASE Scientific International, Ltd. | INDICAID COVID-19 Rapid Antigen Test                             | LF, VR, SS, ST                                                  | 07/28/2021      |                                         | H, M, W                          |
|                                      | INDICAID COVID-19 Rapid Antigen At-Home Test                     | LF, VR, OTC, SS, ST                                             | 3/16/2022       |                                         | Home, H, M, W                    |
| QIAGEN GmbH                          | QIAreacH SARS-CoV-2 Antigen                                      | Digital LF, Fluorescence, IR, ST                                | 08/05/2021      |                                         | H, M                             |
| Quidel Corporation                   | QuickVue SARS Antigen Test                                       | LF, VR, SS, ST                                                  | 12/18/2020      |                                         | H, M, W                          |
|                                      | QuickVue At-Home OTC COVID-19 Test                               | LF, VR, OTC, SS, ST                                             | 03/31/2021      |                                         | Home, H, M, W                    |
|                                      | Sofia SARS Antigen FIA                                           | LF, Fluorescence, IR, SS, ST                                    | 05/08/2020      |                                         | H, M, W                          |
|                                      | QuickVue At-Home COVID-19 Test                                   | LF, VR, PHT, ST                                                 | 03/01/2021      |                                         | Home, H, M, W                    |
| Salofa Oy                            | Sienna-Clarity COVID-19 Antigen Rapid Test Cassette              | LF, VR, ST                                                      | 05/20/2021      |                                         | H, M, W                          |
| SD Biosensor, Inc.                   | Pilot COVID-19 At-Home Test                                      | LF, VR, OTC, SS, ST                                             | 12/24/2021      |                                         | Home, H, M, W                    |
| Siemens Healthcare Diagnostics, Inc. | Atellica IM SARS-CoV-2 Antigen                                   | CLIA, Single Target                                             | 3/11/2022       |                                         | H, M                             |
|                                      | ADVIA Centaur SARS-CoV-2 Antigen                                 | CLIA, Single Target                                             | 3/11/2022       |                                         | H, M                             |
| Siemens Healthineers                 | CLINITEST Rapid COVID-19 Antigen Self-Test                       | LF, VR, OTC, SS, ST                                             | 12/29/2021      |                                         | Home, H, M, W                    |
| Watmind USA                          | Speedy Swab Rapid COVID-19 Antigen Self-Test                     | LF, VR, OTC, SS, ST                                             | 07/08/2022      |                                         | Home, H, M, W                    |
| Xiamen Bosen Biotech Co., Ltd.       | Rapid SARS-CoV-2 Antigen Test Card                               | LF, VR, OTC, Serial Testing, ST                                 | 04/06/2022      |                                         | Home, H, M, W                    |
| Xtrava Health                        | SPERA COVID-19 Ag Test                                           | LF, VR, ST                                                      | 10/12/2021      |                                         | H, M, W                          |
| Becton, Dickinson and Company (BD)   | BD Veritor System for Rapid Detection of SARS-CoV-2 & Flu A+B    | Chromatographic Digital IA, IR, Multi-analyte, ST               | 03/24/2021      | N-protein<br>Influenza A<br>Influenza B | H, M, W                          |
| Princeton BioMeditech Corp.          | Status COVID-19/Flu A&B                                          | LF, VR, Multi-analyte, ST                                       | 02/04/2021      |                                         | H, M, W                          |
| Quidel Corporation                   | Sofia 2 Flu + SARS Antigen FIA                                   | LF, Fluorescence, IR, Multi-Analyte, ST                         | 10/02/2020      |                                         | H, M, W                          |

<sup>1</sup> U.S. Food and Drug Administration. In Vitro Diagnostics EUAs - Antigen Diagnostic Tests for SARS-CoV-2. <https://www.fda.gov/medical-devices/coronavirus-disease-2019-covid-19-emergency-use-authorizations-diagnostic-devices/in-vitro-diagnostics-euas-antigen-diagnostic-tests-sars-cov-2>. Accessed September 22, 2022.

<sup>2</sup> Lateral Flow (LF), Visual Read (VR), Single Target (ST), Serial Screening (SS), Over-the-Counter Home Testing (OTC), Telehealth Proctor Supervised (TPS), Instrument Read (IR), Immunoassay (IA), Prescription Home Testing (PHT), Multiple Targets (MT)

<sup>3</sup> H - Labs certified under Clinical Laboratory Improvement Amendments of 1988 (CLIA), 42 U.S.C. §263a, that meet requirements to perform high complexity tests.

M - Labs certified under CLIA, 42 U.S.C. §263a, that meet requirements to perform moderate complexity tests.

W - Patient care settings operating under a CLIA Certificate of Waiver.

**Table S2: SARS-CoV-2 Variants and Current SARS-CoV-2 Interagency Group (SIG) Classification<sup>1</sup>**

| <b>WHO Label</b> | <b>PANGO Lineage</b>                                        | <b>Location and Time First Detected</b> | <b>SIG Classification (as of 22Sep2022)</b> |
|------------------|-------------------------------------------------------------|-----------------------------------------|---------------------------------------------|
| Alpha            | B.1.1.7 and Q lineages                                      | UK, Late 2020                           | Variant Being Monitored                     |
| Beta             | B.1.351 and descendent lineages                             | South Africa, Late 2020                 |                                             |
| Gamma            | P.1 and descendent lineages                                 | Brazil, Late 2020                       |                                             |
| Delta            | B.1.617.2 and AY lineages                                   | India, Late 2020                        |                                             |
| Omicron          | B.1.1.529, BA.1, BA1.1, BA.2, BA.3, BA.4, and BA.5 lineages | South Africa, Nov 2021                  | Variant of Concern                          |

<sup>1</sup> SARS-CoV-2 Variant Classifications and Definitions. <https://www.cdc.gov/coronavirus/2019-ncov/variants/variant-classifications.html>. Accessed September 22, 2022.

**Table S3: Cross-Reactivity of High-Priority Pathogens Commonly Found in the Respiratory Tract Flora**

| Organism                          | Strain                                                                                                 | Source           | Identifier                   | Concentration tested (CFU/mL and PFU/mL) | Number Detected (3 Replicates) | Cross-Reactivity |
|-----------------------------------|--------------------------------------------------------------------------------------------------------|------------------|------------------------------|------------------------------------------|--------------------------------|------------------|
| Human coronavirus                 | 229E                                                                                                   | Isolate          | ATCC Cat# VR-740             | 10 <sup>5</sup>                          | 0/3                            | No               |
| Human coronavirus                 | OC43                                                                                                   | Isolate          | ATCC Cat# VR-1558            | 10 <sup>5</sup>                          | 0/3                            | No               |
| Rhinovirus                        | B632                                                                                                   | Isolate          | ATCC Cat# VR-1645            | 10 <sup>5</sup>                          | 0/3                            | No               |
| <i>Haemophilus influenzae</i>     | Rd [KW20]                                                                                              | Isolate          | ATCC Cat# 51907              | 10 <sup>6</sup>                          | 0/3                            | No               |
| <i>Streptococcus pneumoniae</i>   | 262 [CIP 104340] (Klein) Chester                                                                       | Isolate          | ATCC Cat# 49619              | 10 <sup>6</sup>                          | 0/3                            | No               |
| <i>Streptococcus pyogenes</i>     | Bruno [CIP 104226]                                                                                     | Isolate          | ATCC Cat# 19615              | 10 <sup>6</sup>                          | 0/3                            | No               |
| <i>Candida albicans</i>           | CBS 562 [572, CCRC 20512, CECT 1002, DBVPG 6133, IFO 1385, IGC 3436, JCM 1542, NCYC 597, NRRL Y-12983] | Isolate          | ATCC Cat# 18804              | 10 <sup>6</sup>                          | 0/3                            | No               |
| Pooled human nasal swab           | N/A                                                                                                    | N/A              | N/A                          | N/A                                      | 0/3                            | No               |
| Adenovirus 5                      | Adenoid 75                                                                                             | Isolate          | ATCC Cat# VR-1516            | 10 <sup>5</sup>                          | 0/3                            | No               |
| Parainfluenza virus 3             | ATCC-2011-5                                                                                            | Isolate          | ATCC Cat# VR-1782            | 10 <sup>5</sup>                          | 0/3                            | No               |
| Parainfluenza virus 1             | C35                                                                                                    | Isolate          | ATCC Cat# VR-94              | 10 <sup>5</sup>                          | 0/3                            | No               |
| Influenza A (H1N1)                | A/WS/33                                                                                                | Isolate          | ATCC Cat# VR-1520            | 10 <sup>5</sup>                          | 0/3                            | No               |
| Influenza B                       | B/Florida/78/2015                                                                                      | Isolate          | ATCC Cat# VR-1931            | 10 <sup>5</sup>                          | 0/3                            | No               |
| Enterovirus                       | H                                                                                                      | Isolate          | ATCC Cat# VR-1432            | 10 <sup>5</sup>                          | 0/3                            | No               |
| Respiratory syncytial virus       | Long                                                                                                   | Isolate          | ATCC Cat# VR-26              | 10 <sup>5</sup>                          | 0/3                            | No               |
| <i>Bordetella pertussis</i>       | 18323 [NCTC 10739]                                                                                     | Isolate          | ATCC Cat# 9797               | 10 <sup>6</sup>                          | 0/3                            | No               |
| <i>Mycoplasma pneumoniae</i>      | Eaton Agent [NCTC 10119]                                                                               | Isolate          | ATCC Cat# 15531              | 10 <sup>6</sup>                          | 0/3                            | No               |
| <i>Staphylococcus aureus</i>      | NCTC 8532 [IAM 12544, R. Hugh 2605]                                                                    | Isolate          | ATCC Cat# 12600              | 10 <sup>6</sup>                          | 0/3                            | No               |
| <i>Staphylococcus epidermidis</i> | FDA strain PCI 1200                                                                                    | Isolate          | ATCC Cat# CRM-12228          | 10 <sup>6</sup>                          | 0/3                            | No               |
| **Human coronavirus               | NL63 (heat-inactivated)                                                                                | Isolate          | ZeptoMetrix Cat# 0810228CFHI | 1.70 <sup>5</sup> TCID <sub>50</sub> /mL | 0/3                            | No               |
| Parainfluenza virus 2             | Greer                                                                                                  | Isolate          | ATCC Cat# VR-92              | 10 <sup>5</sup>                          | 0/3                            | No               |
| Parainfluenza virus 4b            | 19503                                                                                                  | Isolate          | BEI Cat# 3238                | 10 <sup>5</sup>                          | 0/3                            | No               |
| Influenza A H3N2                  | A/Hong Kong/8/68                                                                                       | Isolate          | ATCC Cat# VR-1679            | 10 <sup>5</sup>                          | 0/3                            | No               |
| **MERS-CoV                        | EMC/2012                                                                                               | Gamma-irradiated | BEI Cat# NR-50549            | 10 <sup>5</sup>                          | 0/3                            | No               |
| *SARS-CoV                         | Urbani                                                                                                 | Gamma-irradiated | BEI Cat# NR-9323             | 10 <sup>5</sup>                          | 0/3                            | No               |
| Human Metapneumovirus             | TN/83-1211                                                                                             | Isolate          | BEI Cat# NR-22227            | 10 <sup>5</sup>                          | 0/3                            | No               |
| <i>Chlamydiaceae, Chlamydia</i>   | AR-39                                                                                                  | Isolate          | ATCC Cat# 53592              | 10 <sup>6</sup>                          | 0/3                            | No               |
| <i>Legionella pneumophila</i>     | Concord 3 [NCTC 11985]                                                                                 | Isolate          | ATCC Cat# 33152              | 10 <sup>6</sup>                          | 0/3                            | No               |

**Table S4: Interference of High-Priority Pathogens Commonly Found in the Respiratory Tract Flora**

| Organism (Identifier)                              | Pool | Concentration Tested (CFU/mL and PFU/mL) | Number Detected (3 Replicates) | Interference |
|----------------------------------------------------|------|------------------------------------------|--------------------------------|--------------|
| <i>Mycoplasma pneumoniae</i> (ATCC 15531)          | 1    | 1.00E+06                                 | 3/3                            | No           |
| <i>Streptococcus pneumoniae</i> (ATCC 49619)       |      | 1.00E+06                                 |                                |              |
| <i>Haemophilus influenzae</i> (ATCC 51907)         |      | 1.00E+06                                 |                                |              |
| Adenovirus 5 (ATCC VR-1516)                        |      | 1.00E+05                                 |                                |              |
| <i>Bordetella pertussis</i> (ATCC 9797)            |      | 1.00E+06                                 |                                |              |
| <i>Streptococcus pyogenes</i> ATCC (19615)         | 2    | 1.00E+06                                 | 3/3                            | No           |
| Rhinovirus (ATCC VR-1645)                          |      | 1.00E+05                                 |                                |              |
| Human coronavirus OC43 (ATCC VR-1558)              |      | 1.00E+05                                 |                                |              |
| <i>Candida albicans</i> (ATCC 18804)               |      | 1.00E+06                                 |                                |              |
| <i>Staphylococcus aureus</i> (ATCC 12600)          |      | 1.00E+06                                 |                                |              |
| Human coronavirus 229E (ATCC VR-740)               | 3    | 1.00E+05                                 | 3/3                            | No           |
| Respiratory syncytial virus (ATCC VR-26)           |      | 1.00E+05                                 |                                |              |
| Parainfluenza virus 1 (ATCC VR-94)                 |      | 1.00E+05                                 |                                |              |
| <i>Staphylococcus epidermidis</i> (ATCC CRM-12228) |      | 1.00E+06                                 |                                |              |
| SARS-CoV (BEI NR-9323)                             |      | 1.00E+05                                 |                                |              |
| Parainfluenza virus 3 (ATCC VR-1782)               | 4    | 1.00E+05                                 | 3/3                            | No           |
| Influenza A (H1N1) (ATCC VR-1520)                  |      | 1.00E+05                                 |                                |              |
| Influenza B (ATCC VR-1931)                         |      | 1.00E+05                                 |                                |              |
| Enterovirus (ATCC VR-1432)                         |      | 1.00E+05                                 |                                |              |
| MERS-CoV (BEI NR-50549)                            |      | 1.00E+05                                 |                                |              |
| Influenza A (H3N2) (ATCC VR-1679)                  | 5    | 1.00E+05                                 | 3/3                            | No           |
| <i>Chlamydiaceae</i> (ATCC 53592)                  |      | 1.00E+06                                 |                                |              |
| <i>Legionella pneumophila</i> (ATCC 35096)         |      | 1.00E+06                                 |                                |              |
| Coronavirus NL63 (Zeptomatrix 0810228CFHI)         |      | 1.00E+05                                 |                                |              |
| Human Metapneumovirus (BEI NR-22227)               |      | 1.00E+05                                 |                                |              |
| Human parainfluenza 2 (ATCC VR-92)                 | 6    | 1.00E+05                                 | 3/3                            | No           |
| Parainfluenza 4B (BEI NR-3238)                     |      | 1.00E+05                                 |                                |              |
| Pooled Nasal Wash                                  |      | N/A                                      |                                |              |

**Table S5: Cross-Reactivity and Interference of Endogenous Substances**

| Potential interfering substances | Active Ingredient           | (Recommended) Concentration Tested | Number Detected (3 Replicates) | Cross-Reactivity At Tested Concentration | Number Detected (3 Replicates) | Interference |
|----------------------------------|-----------------------------|------------------------------------|--------------------------------|------------------------------------------|--------------------------------|--------------|
| Afrin                            | Oxymetazoline               | 15% v/v                            | 0/3                            | No                                       | 3/3                            | No           |
| Azithromycin                     | Azithromycin                | 250 ug/mL                          | 0/3                            | No                                       | 3/3                            | No           |
| Blood (Human)                    | Blood                       | 4%                                 | 3/3                            | Yes                                      | 3/3                            | No           |
| Chloraseptic                     | Menthol                     | 1.5 mg/mL                          | 0/3                            | No                                       | 3/3                            | No           |
| Clathromycin                     | Clathromycin                | 1 mg/mL                            | 0/3                            | No                                       | 3/3                            | No           |
| Fonase                           | Fluticasone Propionate      | 5% v/v                             | 0/3                            | No                                       | 3/3                            | No           |
| Homeopathic                      | Alkalol                     | 1:10 dilution                      | 0/3                            | No                                       | 3/3                            | No           |
| Mucin                            | Purified mucin protein      | 0.5% w/v                           | 2/3                            | Yes                                      | 3/3                            | No           |
| Mupirocin                        | Mupirocin                   | 10 mg/mL                           | 2/3                            | Yes                                      | 3/3                            | No           |
| Nasal Drops                      | Phenylephrine hydrochloride | 15% v/v                            | 1/3                            | Yes                                      | 3/3                            | No           |
| Nasal Spray                      | Cromolyn                    | 15% v/v                            | 0/3                            | No                                       | 3/3                            | No           |
| Nelimed                          | Hyaluronic Acid             | 5% v/v                             | 0/3                            | No                                       | 3/3                            | No           |
| Phenol Throat Spray              | Phenol                      | 15% v/v                            | 0/3                            | No                                       | 3/3                            | No           |
| Saline Nasal Spray               | Saline                      | 5% v/v                             | 0/3                            | No                                       | 3/3                            | No           |
| Tamiflu                          | Oseltamivir                 | 5 mg/mL                            | 1/3                            | Yes                                      | 3/3                            | No           |
| Tobramycin                       | Tobramycin                  | 4 mg/mL                            | 0/3                            | No                                       | 3/3                            | No           |
| Zicam                            | Oxymetazoline hydrochloride | 5% v/v                             | 3/3                            | Yes                                      | 3/3                            | No           |
